# Supplementary material
Source: PubMed Central journal article supplement (PMC4137147)
Supplement: tableS1.pdf [file tableS1.pdf]

## SUPPLEMENTAL MATERIAL

**Supplemental Table 1** Top correlations (partial, adjusted for sex and parent of origin) between exercise / body composition traits and transcript levels. For a complete description of exercise and body composition traits see Refs. (23-25)

| <b>ProbeID</b>               | <b>Gene Symbol</b> | <b>Exercise / Body Composition Trait</b> | <b><i>n</i></b> | <b>Partial <i>r</i></b> |
|------------------------------|--------------------|------------------------------------------|-----------------|-------------------------|
| <i>Running distance</i>      |                    |                                          |                 |                         |
| ILMN_2614895                 | Nus1               | Day 1                                    | 233             | 0.3333**                |
| ILMN_2983587                 | Acot8              | Day 2                                    | 233             | 0.3429**                |
| ILMN_2983587                 | Acot8              | Day 3                                    | 239             | 0.3415**                |
| ILMN_2760295                 | AK206957           | Day 4                                    | 216             | 0.3588**                |
| ILMN_2760295                 | AK206957           | Day 5                                    | 243             | 0.3919**                |
| ILMN_2596522                 | Mt1                | Day 6                                    | 243             | 0.4769**                |
| ILMN_2596522                 | Mt1                | (Days 5 + 6)/2                           | 243             | 0.4513**                |
| ILMN_1220686                 | Car14              | Slope (days 1-6)                         | 206             | 0.3270*                 |
| ILMN_2755443                 | Sh3kbp1            | Intercept (days 1-6)                     | 206             | 0.3601**                |
| <i>Running time</i>          |                    |                                          |                 |                         |
| ILMN_2730208                 | Mup2               | Day 1                                    | 233             | 0.3720**                |
| ILMN_2730208                 | Mup2               | Day 2                                    | 233             | 0.3395*                 |
| ILMN_2709179                 | Eepd1              | Day 3                                    | 239             | -0.3707**               |
| ILMN_2709179                 | Eepd1              | Day 4                                    | 216             | 0.4159**                |
| ILMN_2707834                 | Rpl13a             | Day 5                                    | 243             | 0.3993**                |
| ILMN_2707834                 | Rpl13a             | (Days 5 + 6)/2                           | 243             | 0.4426**                |
| ILMN_2975377                 | Mtmr14             | Slope (days 1-6)                         | 206             | -0.3396*                |
| ILMN_1255013                 | Ilf3               | Intercept (days 1-6)                     | 206             | -0.3422**               |
| <i>Average running speed</i> |                    |                                          |                 |                         |
| ILMN_2596522                 | Mt1                | Day 1                                    | 233             | 0.4003**                |
| ILMN_1225602                 | S100a1             | Day 2                                    | 233             | 0.4050**                |
| ILMN_1225602                 | S100a1             | Day 3                                    | 239             | 0.3787**                |
| ILMN_2973824                 | Car14              | Day 4                                    | 216             | 0.4097**                |
| ILMN_1220686                 | Car14              | Day 5                                    | 243             | 0.4429**                |
| ILMN_1220686                 | Car14              | Day 6                                    | 243             | 0.4086**                |
| ILMN_2596522                 | Mt1                | (Days 5 + 6)/2                           | 243             | 0.4238**                |
| ILMN_1228213                 | Ifi30              | Slope (days 1-6)                         | 206             | 0.3250*                 |
| ILMN_2755443                 | Sh3kbp1            | Intercept (days 1-6)                     | 206             | 0.3592**                |

| <i>Maximum running speed</i>       |          |                       |     |           |
|------------------------------------|----------|-----------------------|-----|-----------|
| ILMN_2420353                       | AK082735 | Day 1                 | 233 | 0.3132*   |
| ILMN_2420353                       | AK082735 | Day 2                 | 233 | 0.3180*   |
| ILMN_2939303                       | Pcyt2    | Day 3                 | 239 | 0.3781**  |
| ILMN_2420353                       | AK082735 | Day 4                 | 216 | 0.4130**  |
| ILMN_1220686                       | Car14    | Day 5                 | 243 | 0.4295**  |
| ILMN_1220686                       | Car14    | Day 6                 | 243 | 0.4219**  |
| ILMN_2707834                       | Rpl13a   | (Days 5 + 6)/2        | 243 | 0.4353**  |
| ILMN_2628567                       | Phlda3   | Slope (days 1-6)      | 206 | 0.3737**  |
| ILMN_1255013                       | Ilf3     | Intercept (days 1-6)  | 206 | 0.3127*   |
| <i>Food consumption</i>            |          |                       |     |           |
| ILMN_1219703                       | Myg1     | Food intake           | 242 | -0.3059** |
| ILMN_1219703                       | Myg1     | Food intake / g       | 241 | 0.3557**  |
| <i>~4 wk of age</i>                |          |                       |     |           |
| ILMN_1223819                       | Stk25    | Body mass, g          | 242 | -0.2909*  |
| ILMN_2484987                       | Man2b1   | % Fat                 | 242 | -0.3302*  |
| ILMN_2484987                       | Man2b1   | % Lean                | 242 | 0.3279*   |
| <i>~6 wk of age</i>                |          |                       |     |           |
| ILMN_1223819                       | Stk25    | Body mass, g          | 241 | -0.3105*  |
| ILMN_2484987                       | Man2b1   | % Fat                 | 241 | -0.3590** |
| ILMN_2484987                       | Man2b1   | % Lean                | 241 | 0.2760*   |
| <i>~8 wk of age / Pre exercise</i> |          |                       |     |           |
| ILMN_2650392                       | Rbm28    | Body mass, g          | 242 | -0.3197*  |
| ILMN_2695964                       | Lep      | % Fat                 | 242 | -0.4002** |
| ILMN_2767216                       | Actc1    | % Lean                | 242 | 0.3582**  |
| <i>Post exercise</i>               |          |                       |     |           |
| ILMN_2738893                       | Ermp1    | Body mass, g          | 242 | 0.3399*   |
| ILMN_2730208                       | Mup2     | % Fat                 | 242 | -0.4430** |
| ILMN_2695964                       | Lep      | % Lean                | 242 | -0.4402** |
| ILMN_2695964                       | Lep      | % Change in body mass | 242 | -0.3122*  |
| ILMN_3065459                       | Mup2     | % Change in % fat     | 242 | 0.3000*   |
| ILMN_3065459                       | Mup2     | % Change in % lean    | 242 | 0.3462*   |

\* P < 0.05, \*\*P < 0.001
